# Supplementary material
Source: ML conference proceedings conference paper supplement (https://openreview.net/forum?id=Dbjzqvmd7t)

Watermark Extraction Performance under Deletion Attack

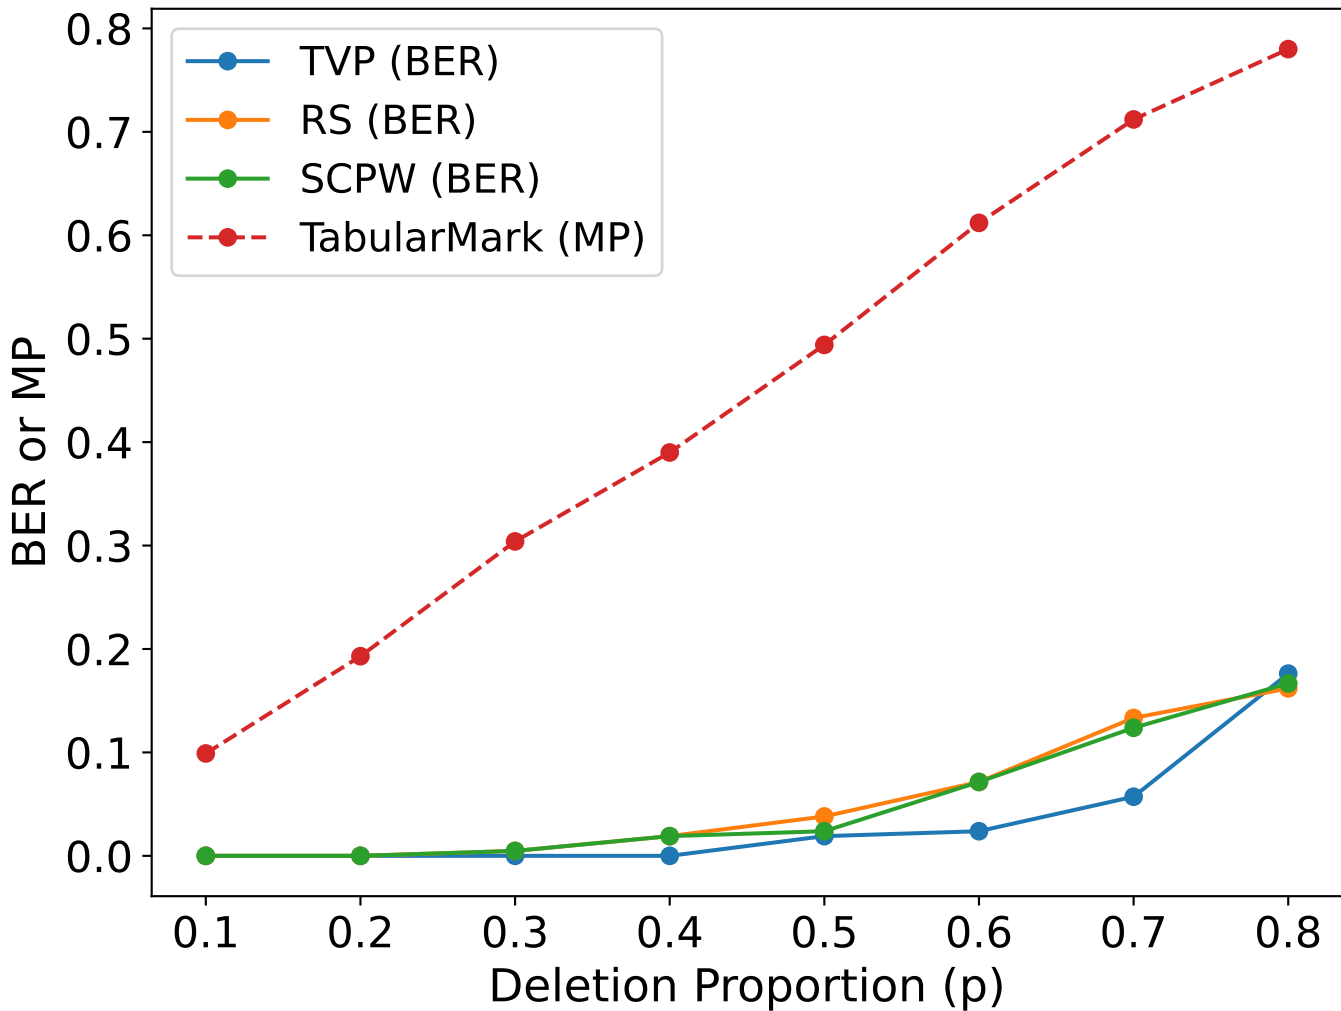

Supplement: supplementary_material [file compare_dele_robust.pkl.pdf › vector_database_watermarking/compare/compare_dele_robust.pkl.pdf]

Watermark Extraction Performance under Modification Attack

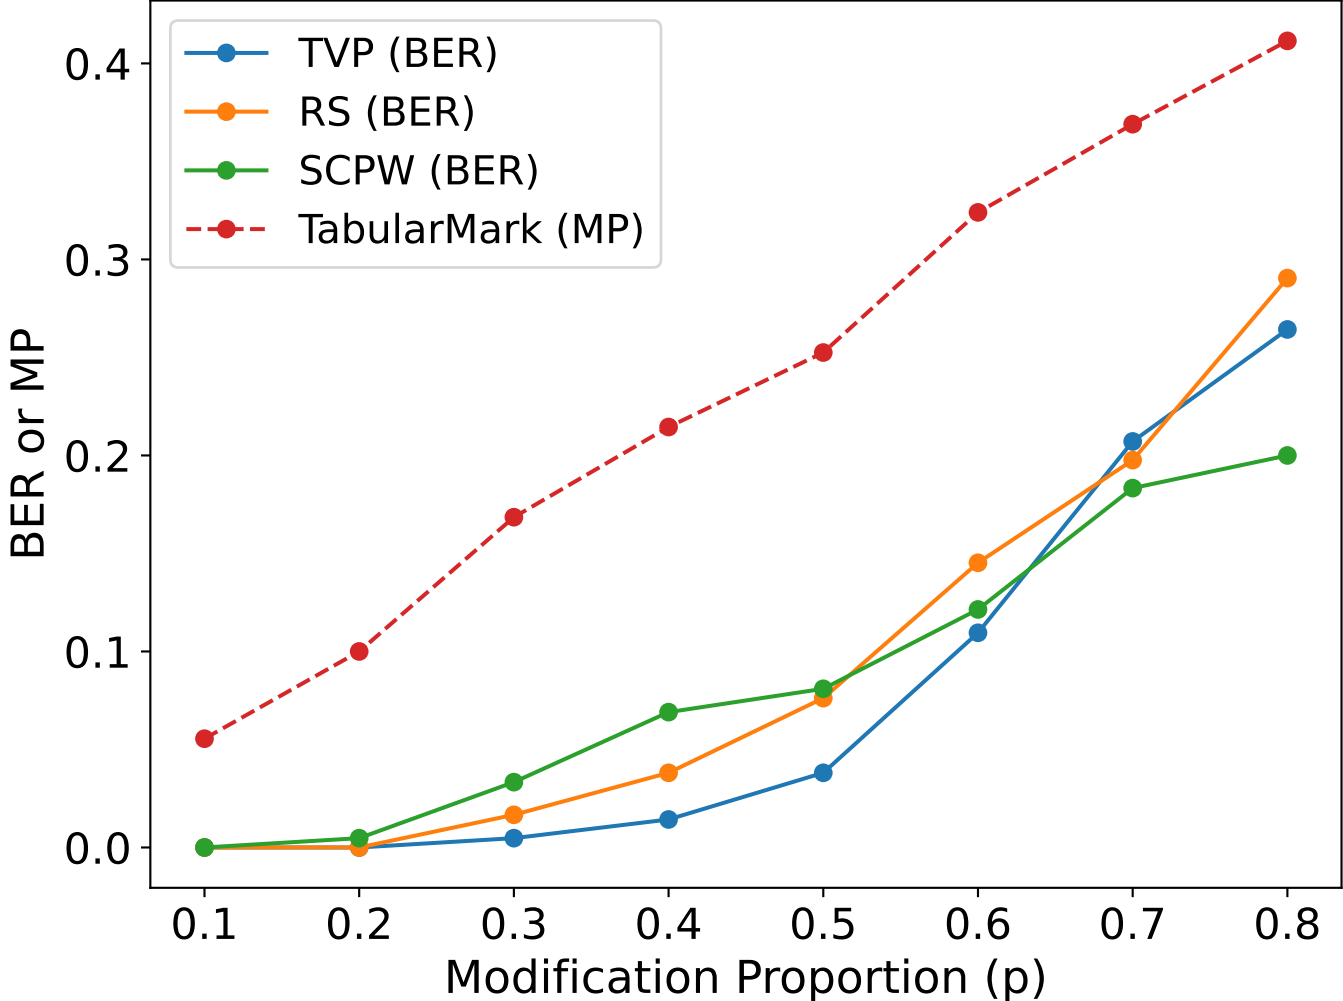

Supplement: supplementary_material [file compare_modi_robust.pkl.pdf › vector_database_watermarking/compare/compare_modi_robust.pkl.pdf]

# Average Missed and False Queries vs Threshold

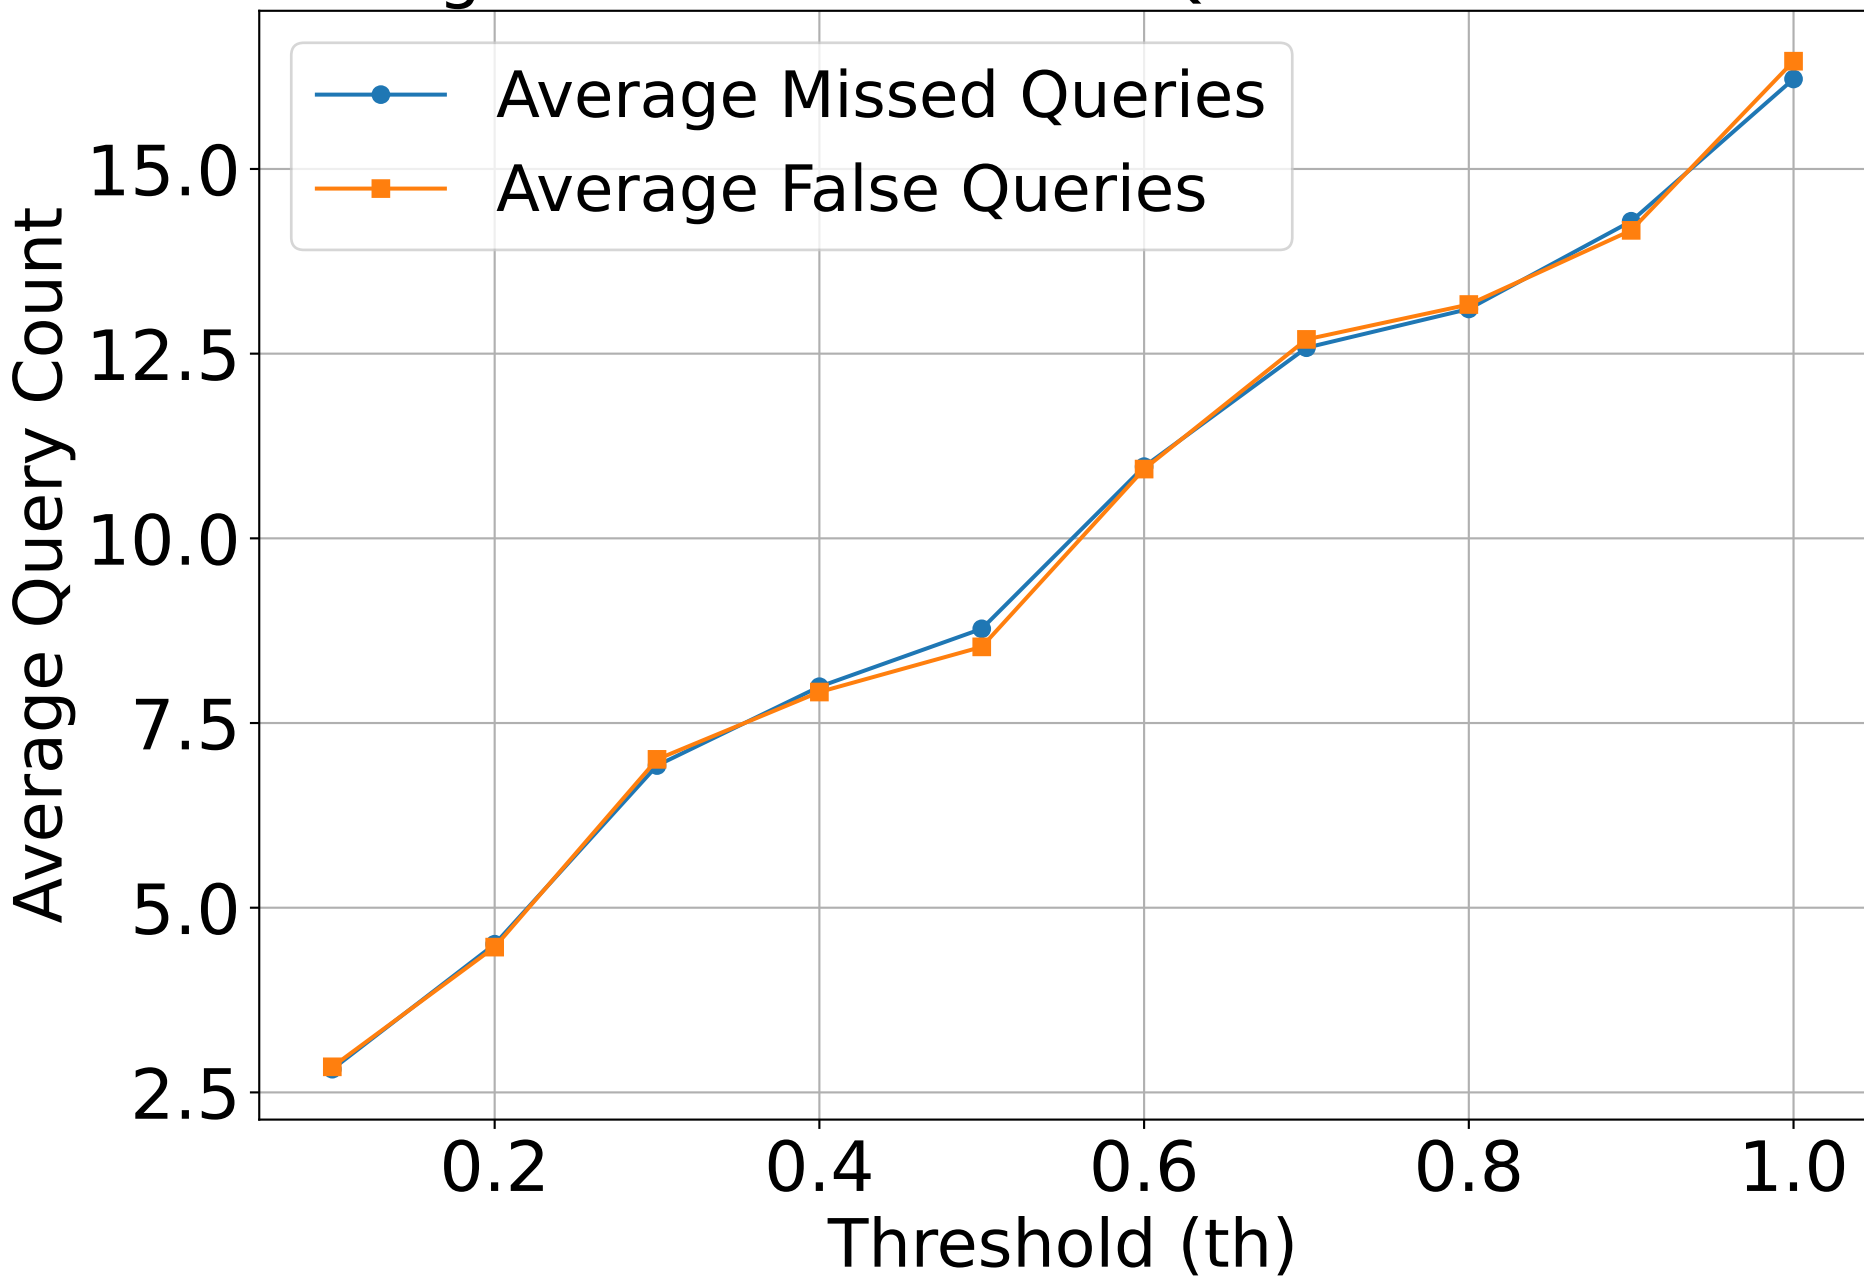

Supplement: supplementary_material [file Threshold1.pdf › vector_database_watermarking/impact/Threshold1.pdf]

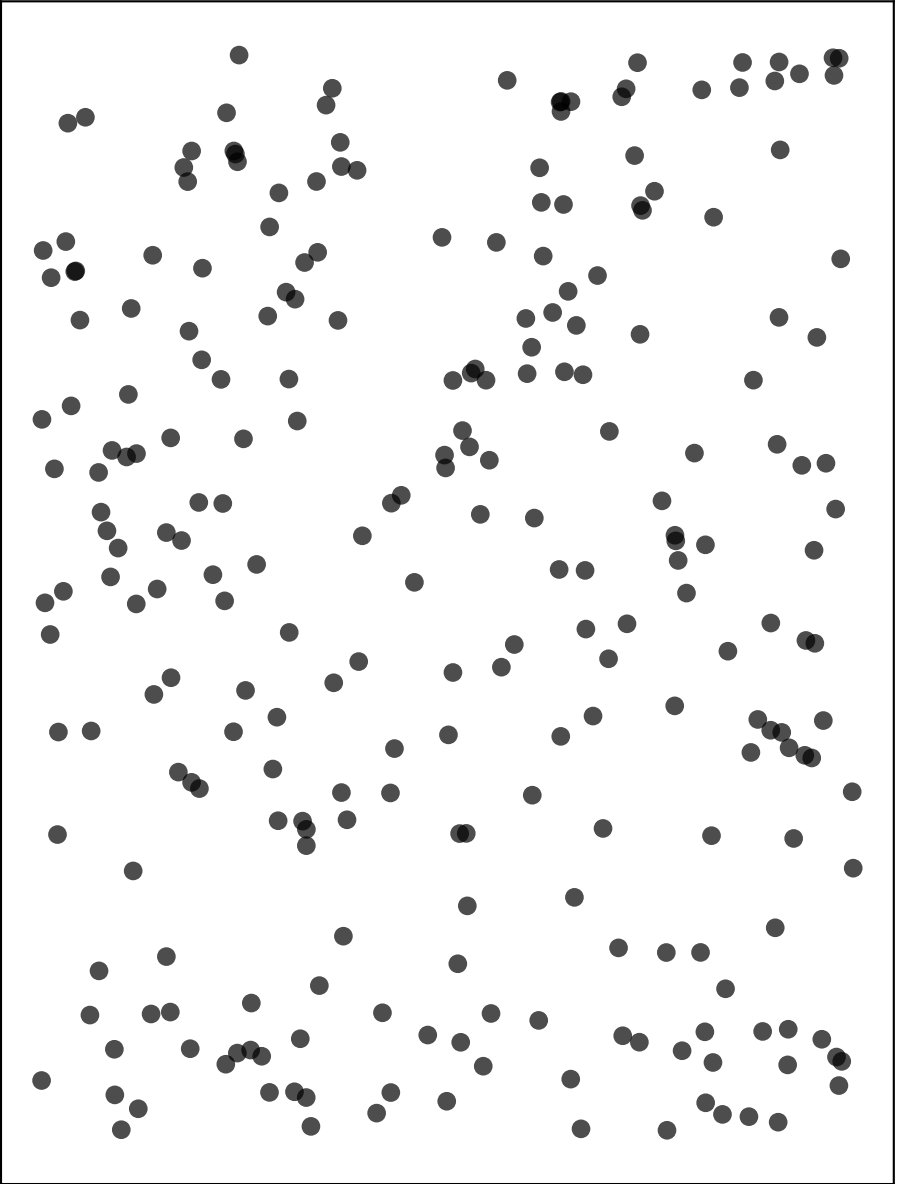

Supplement: supplementary_material [file first.pdf › vector_database_watermarking/plot/first.pdf]

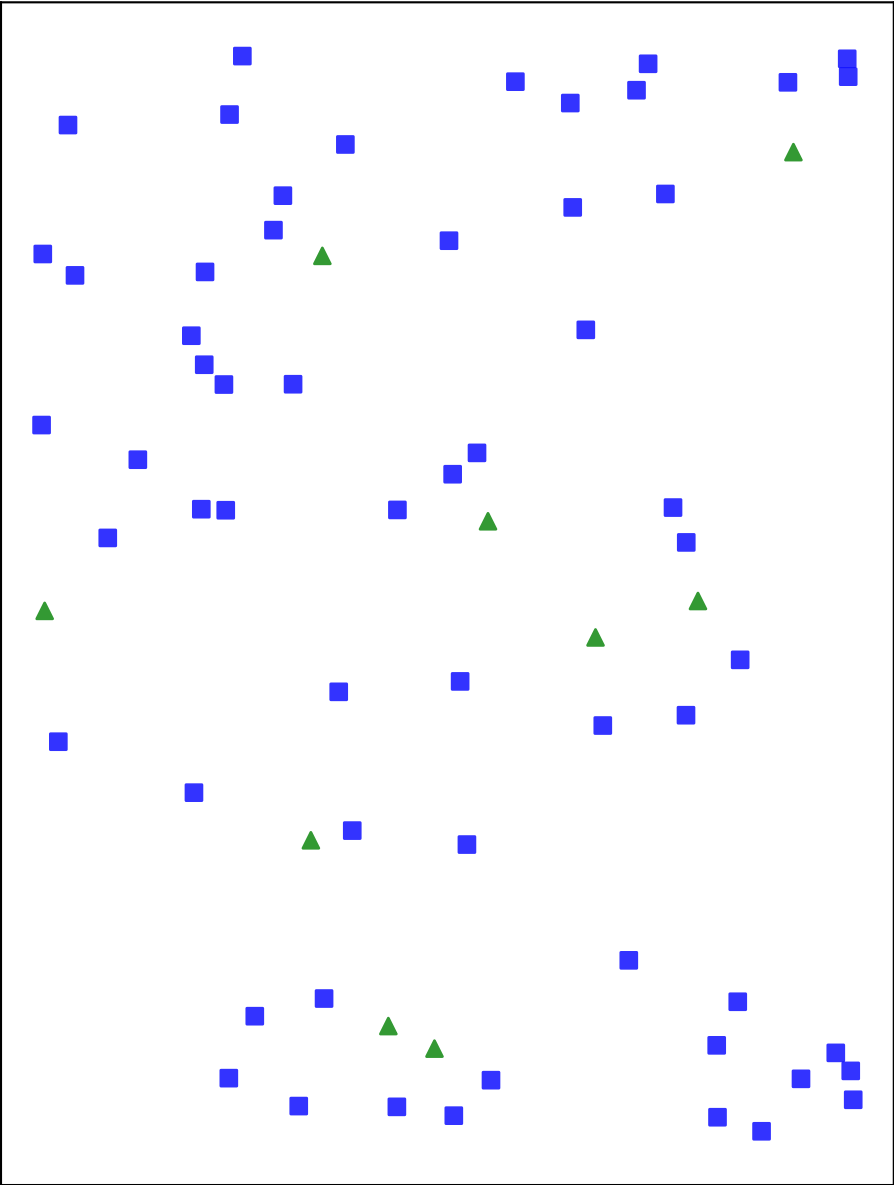

Supplement: supplementary_material [file four.pdf › vector_database_watermarking/plot/four.pdf]

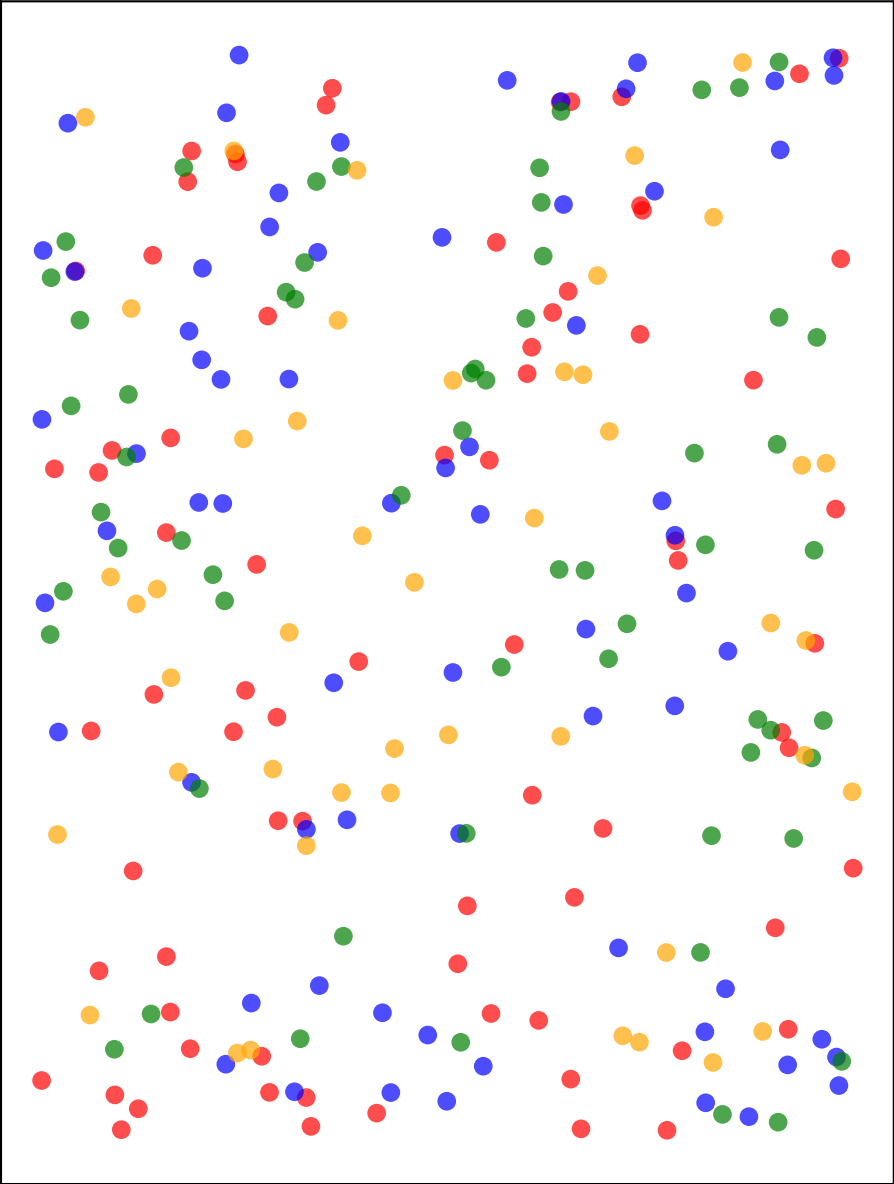

Supplement: supplementary_material [file second.pdf › vector_database_watermarking/plot/second.pdf]

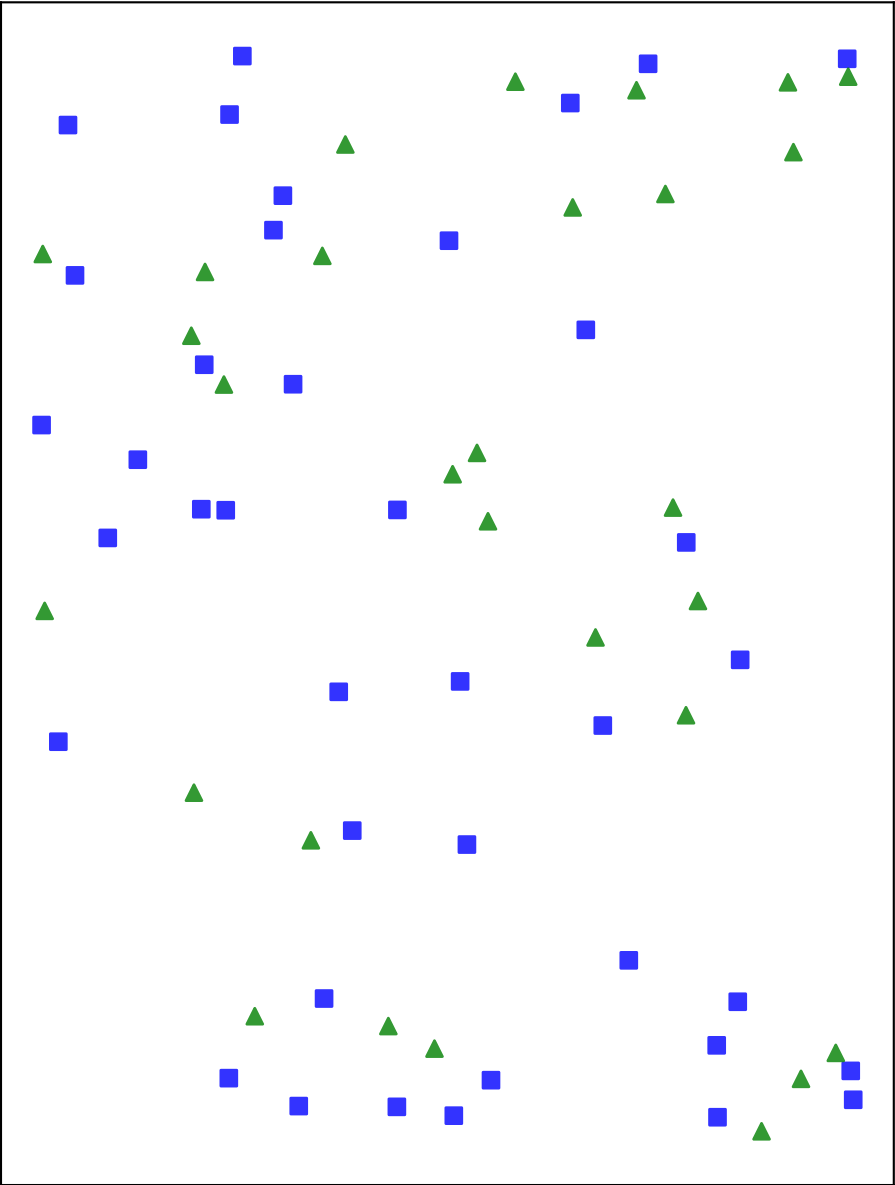

Supplement: supplementary_material [file third.pdf › vector_database_watermarking/plot/third.pdf]

# Impact of Adaptive Deletion on Bit Error Rate

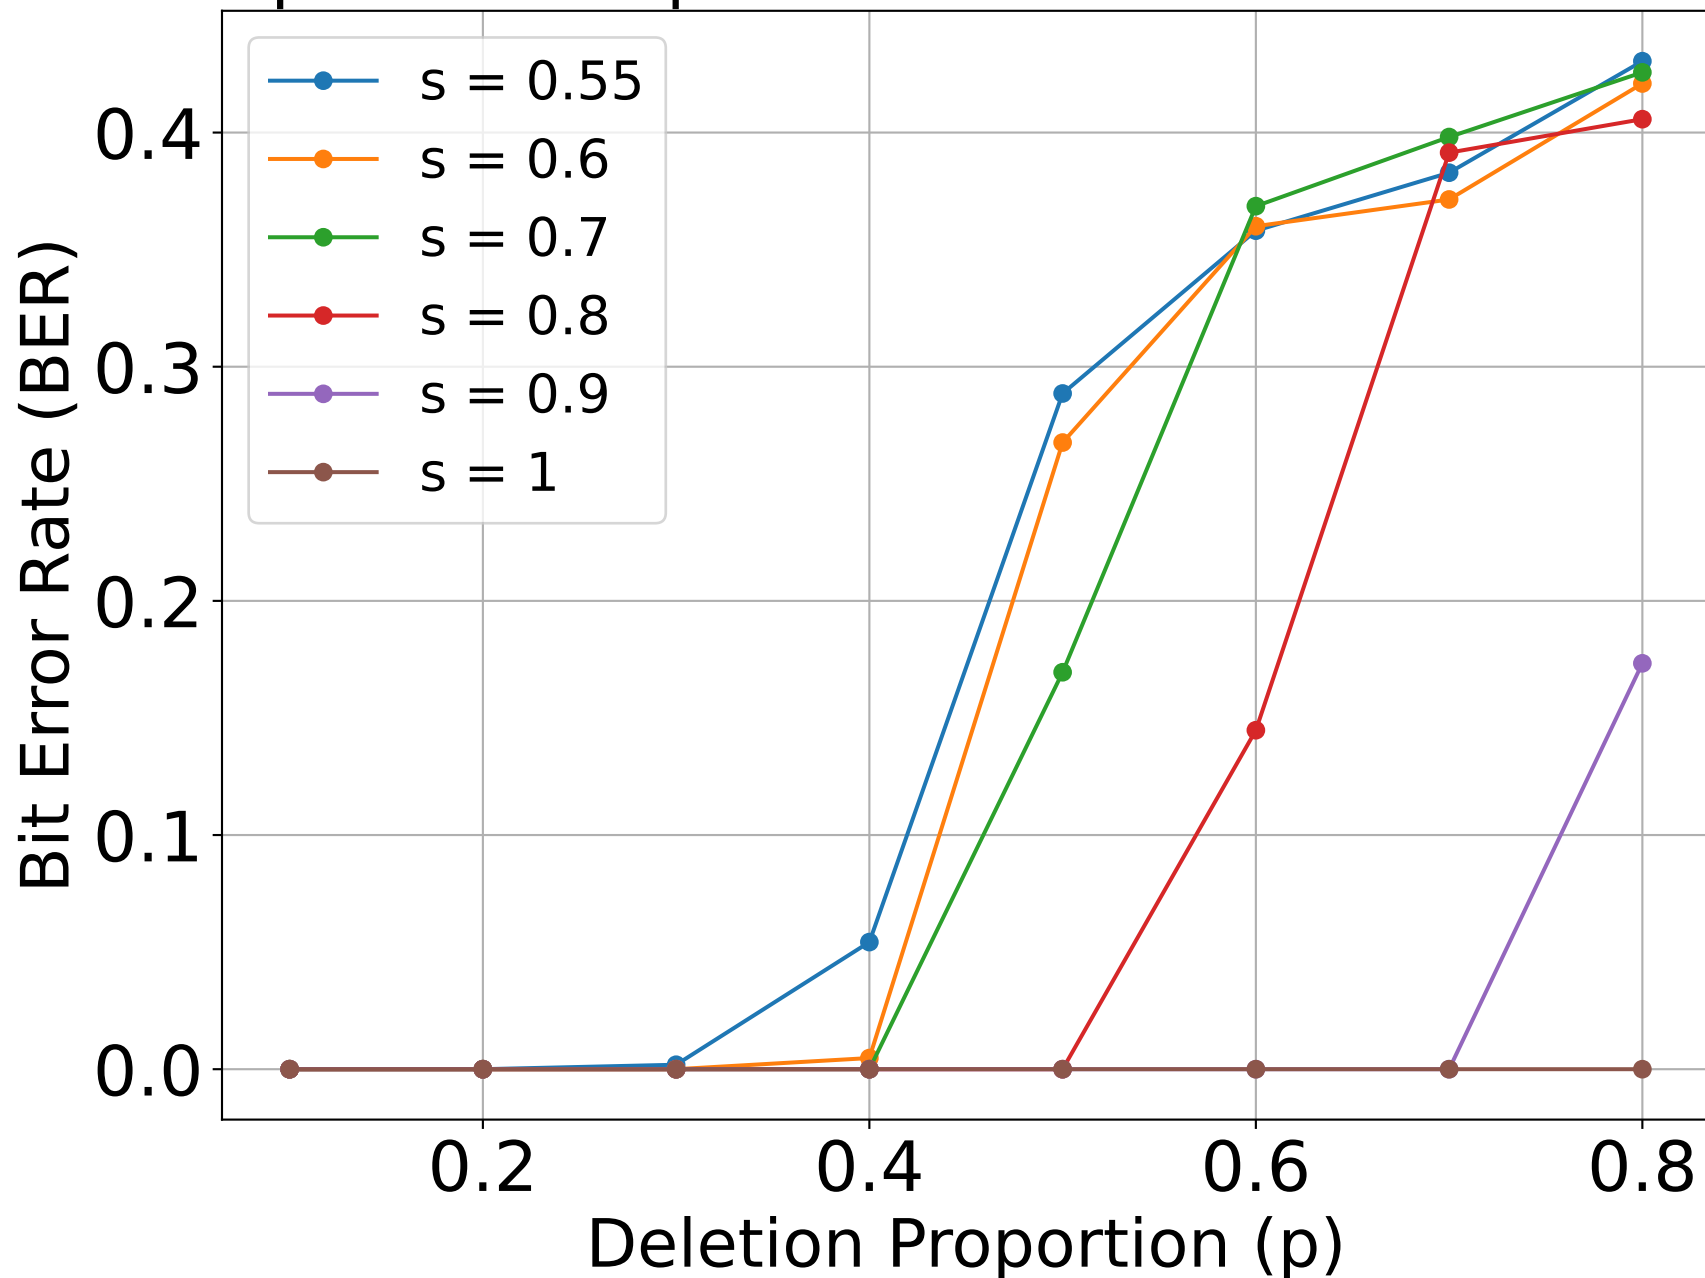

Supplement: supplementary_material [file Adaptive Deletion_str.pdf › vector_database_watermarking/roubust/Adaptive Deletion_str.pdf]

# Impact of Adaptive Deletion on Bit Error Rate

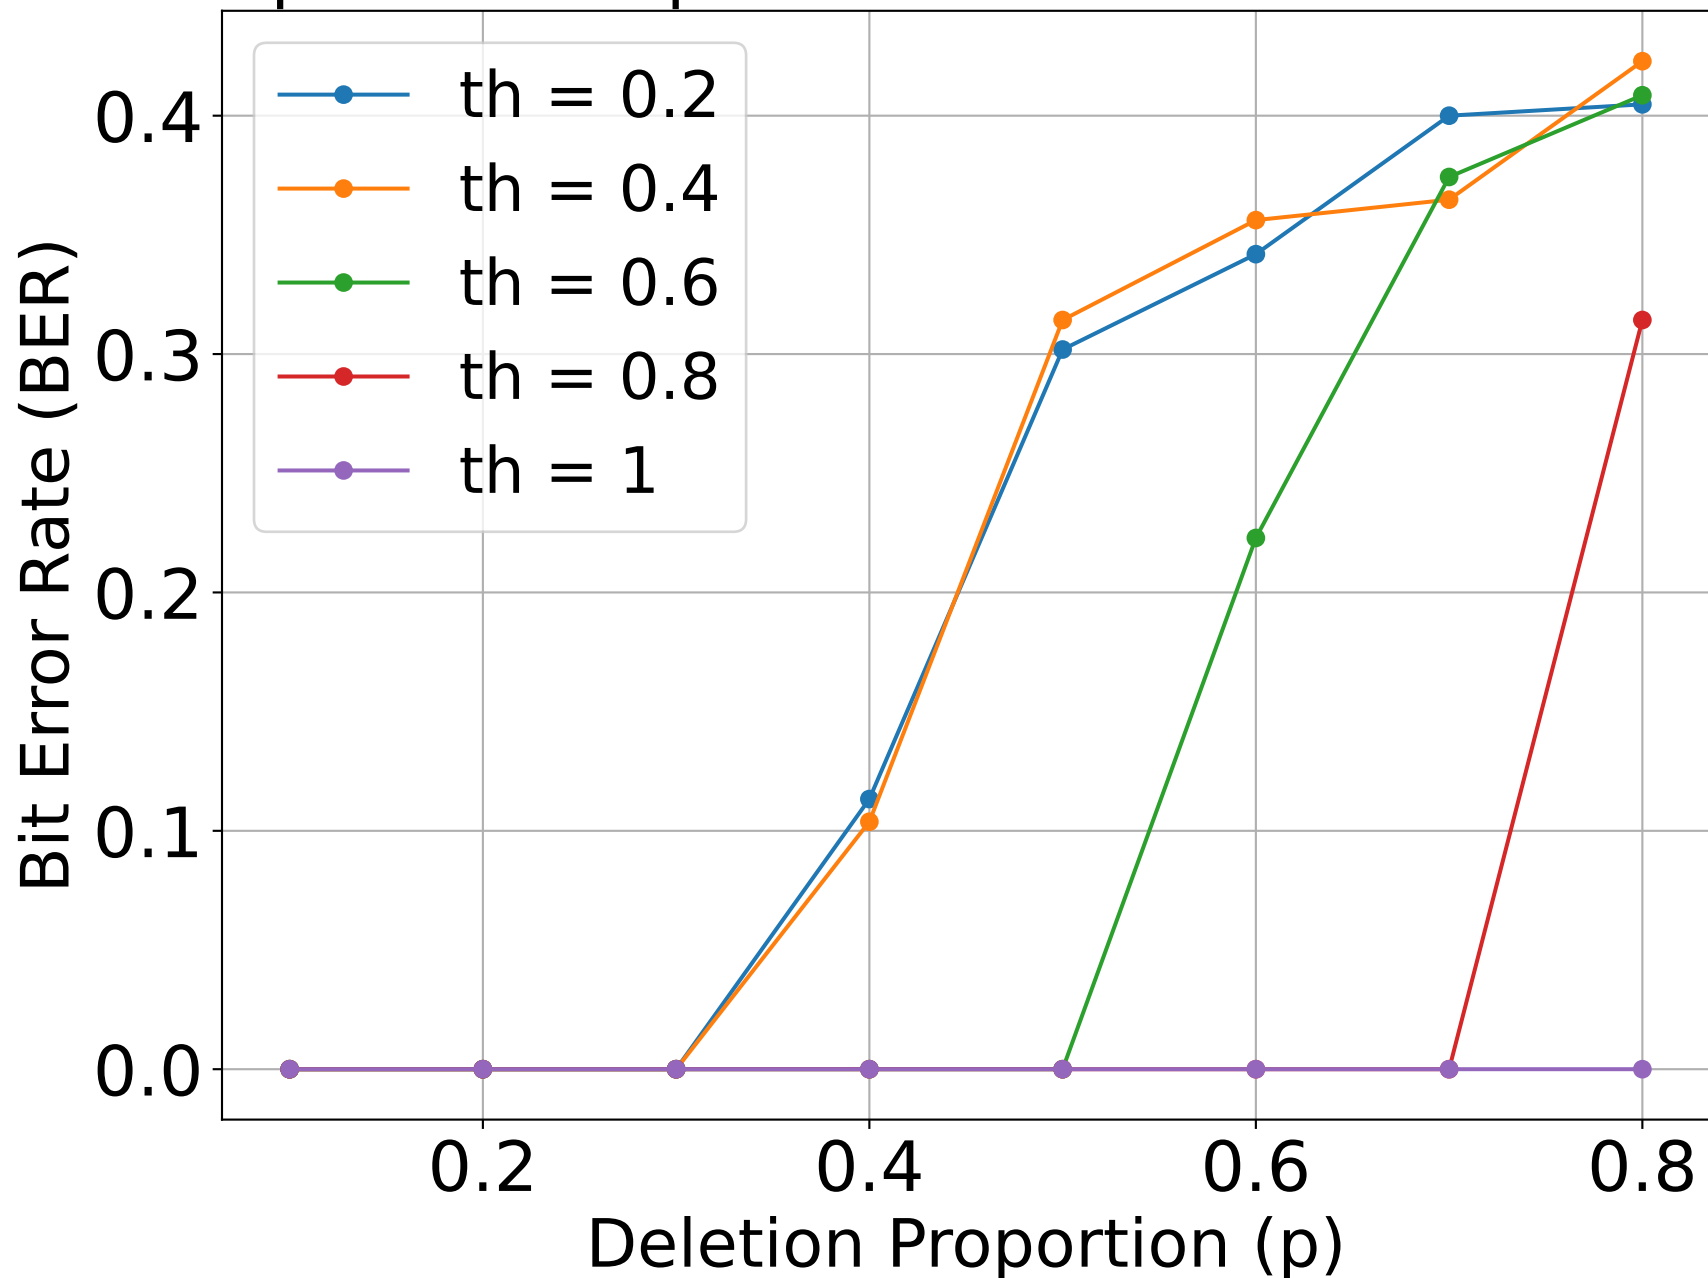

Supplement: supplementary_material [file Adaptive Deletion_th_last.pdf › vector_database_watermarking/roubust/Adaptive Deletion_th_last.pdf]

# Impact of Adaptive Modification on Bit Error Rate

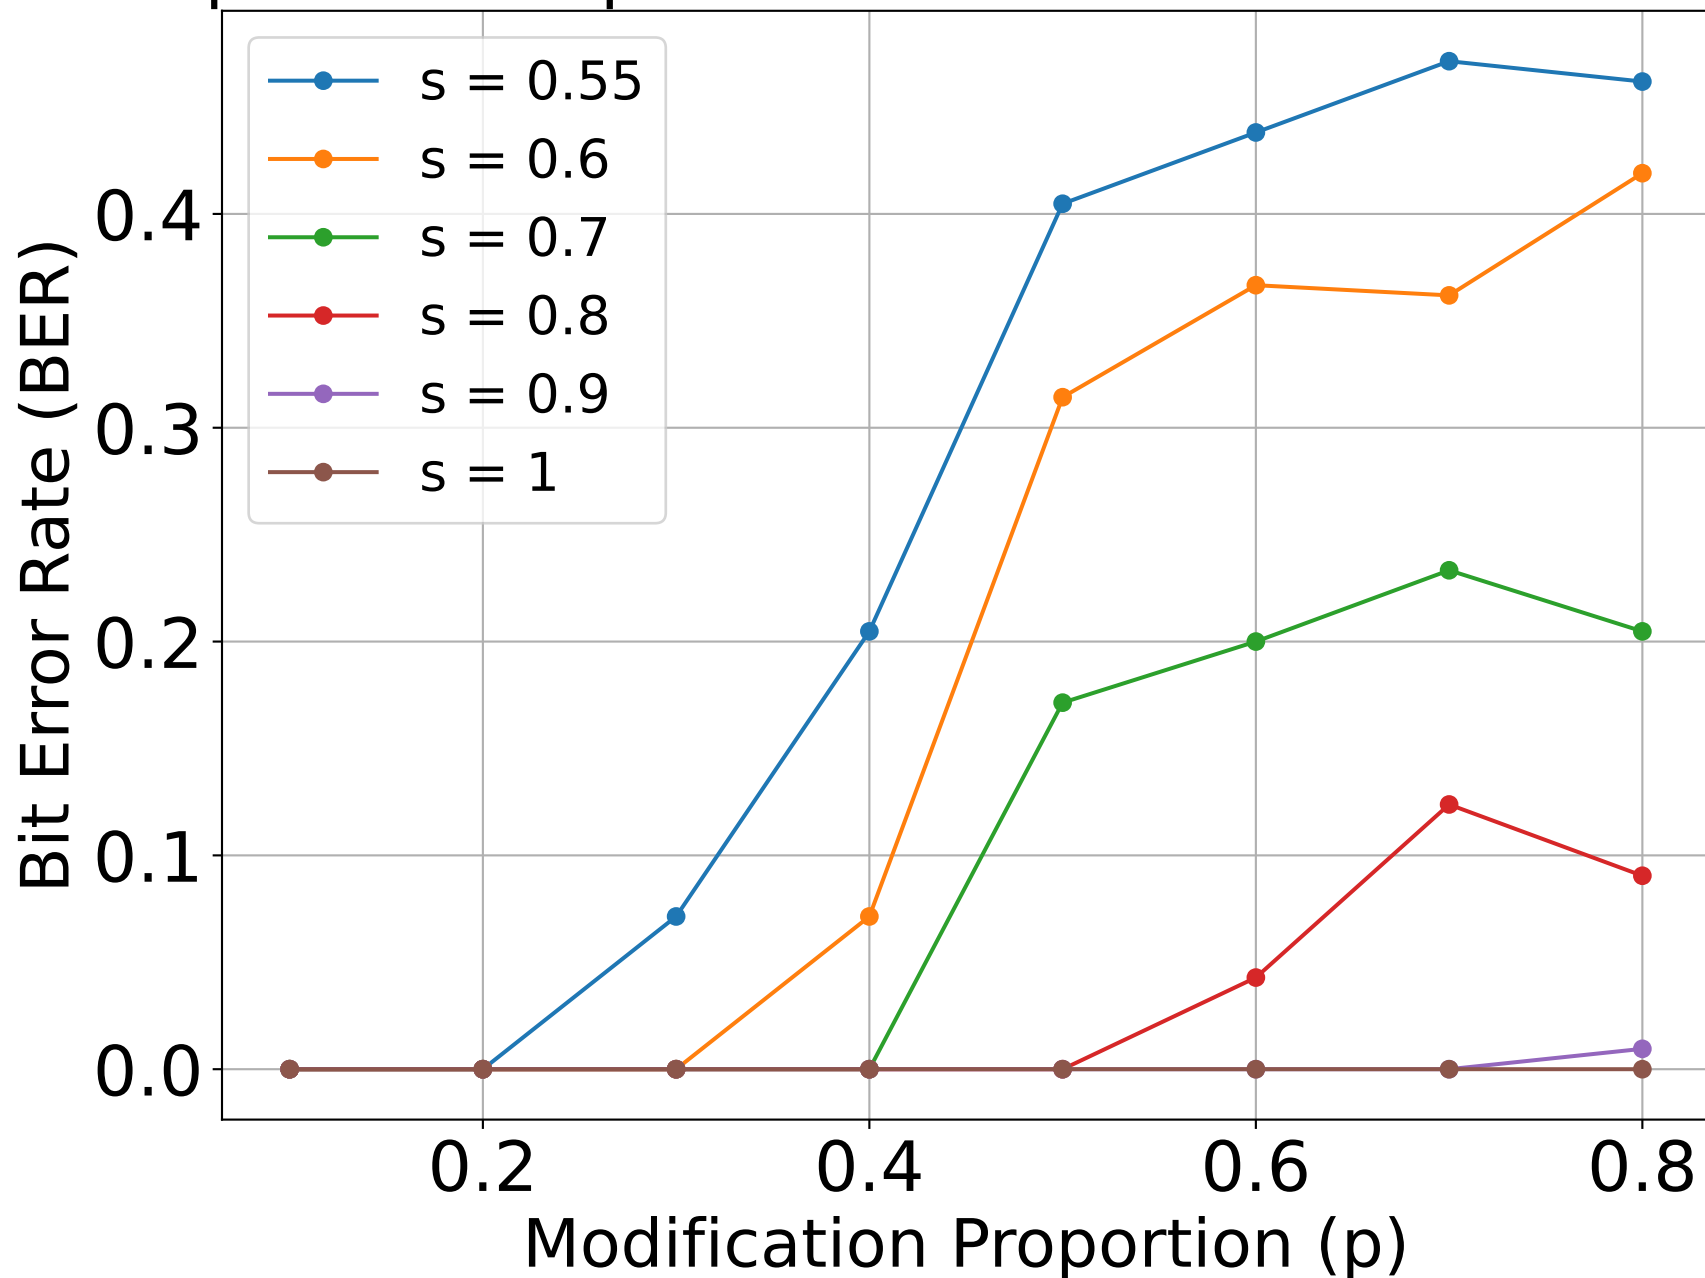

Supplement: supplementary_material [file Adaptive Modification_str.pdf › vector_database_watermarking/roubust/Adaptive Modification_str.pdf]

# Impact of Adaptive Modification on Bit Error Rate

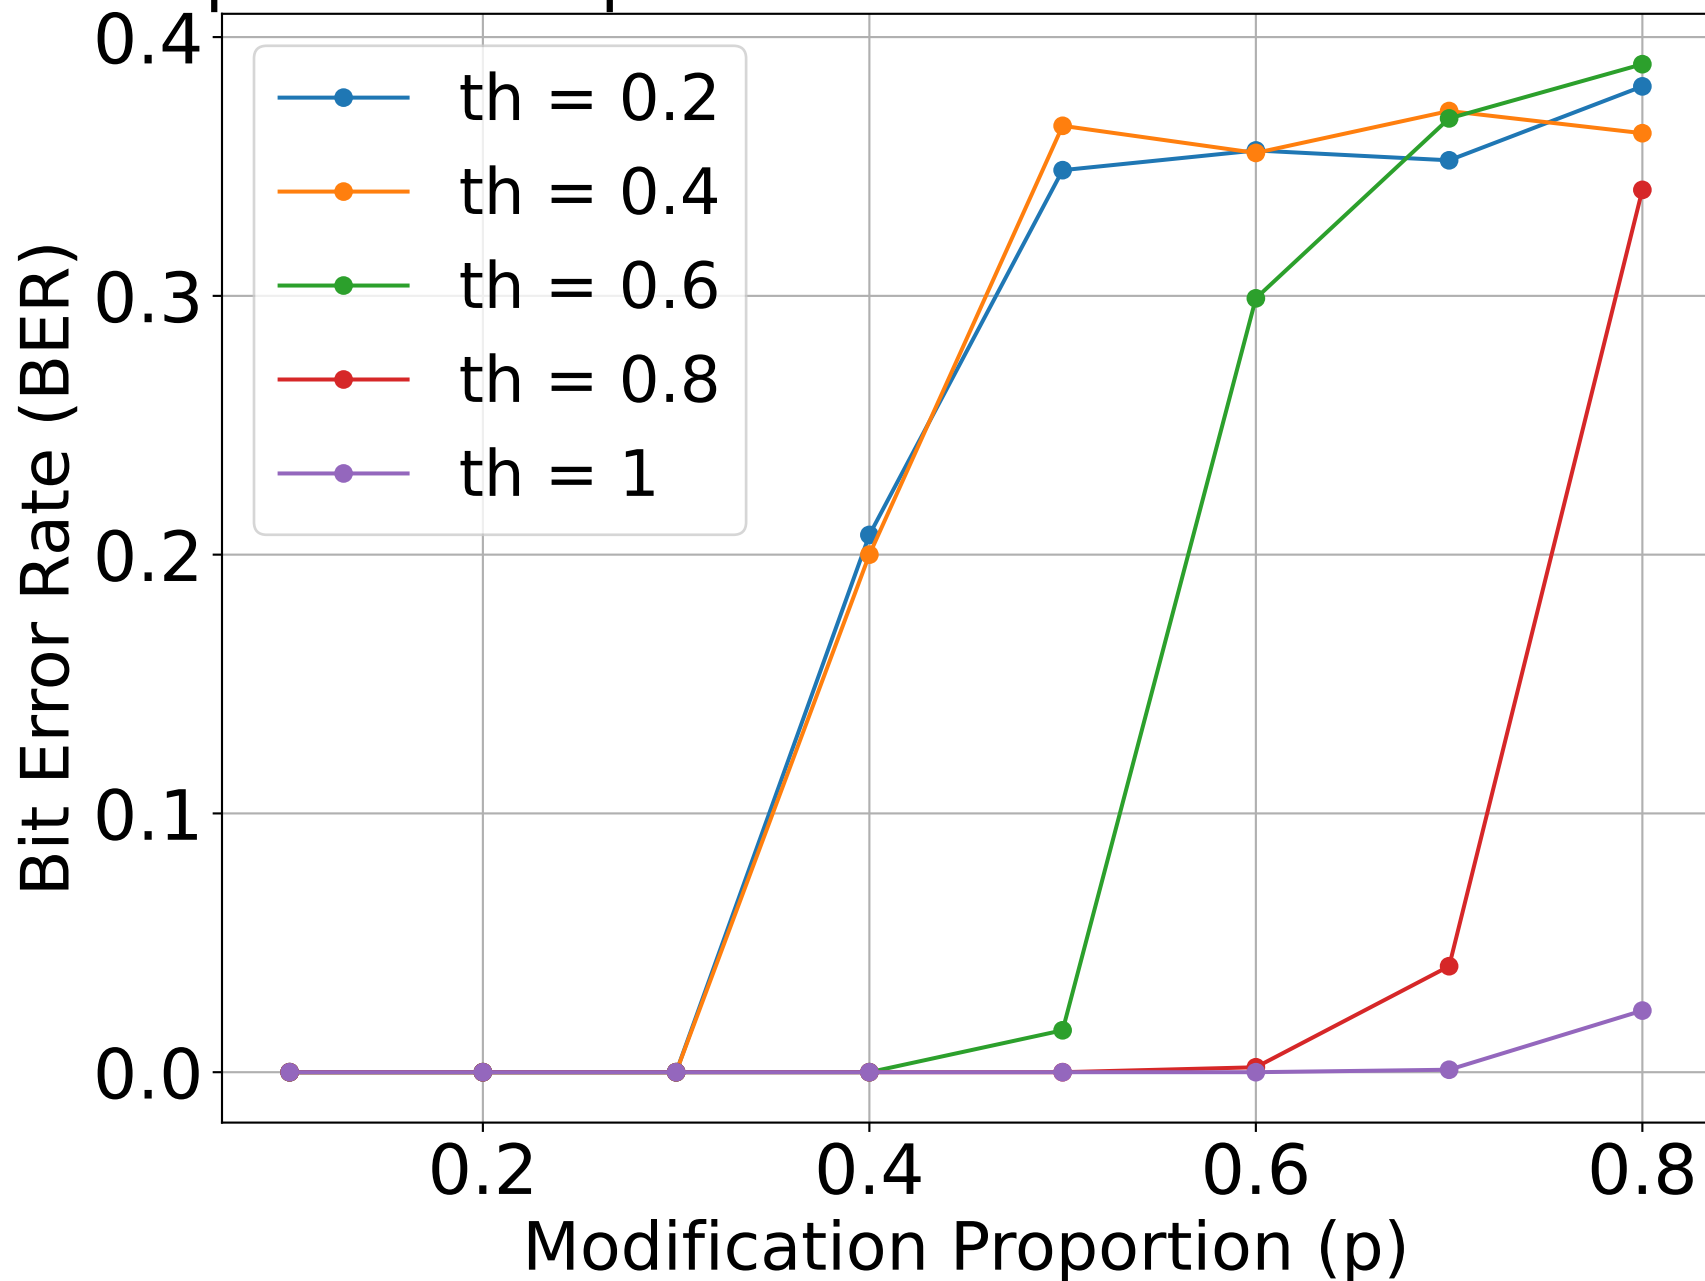

Supplement: supplementary_material [file Adaptive Modification_th_last.pdf › vector_database_watermarking/roubust/Adaptive Modification_th_last.pdf]

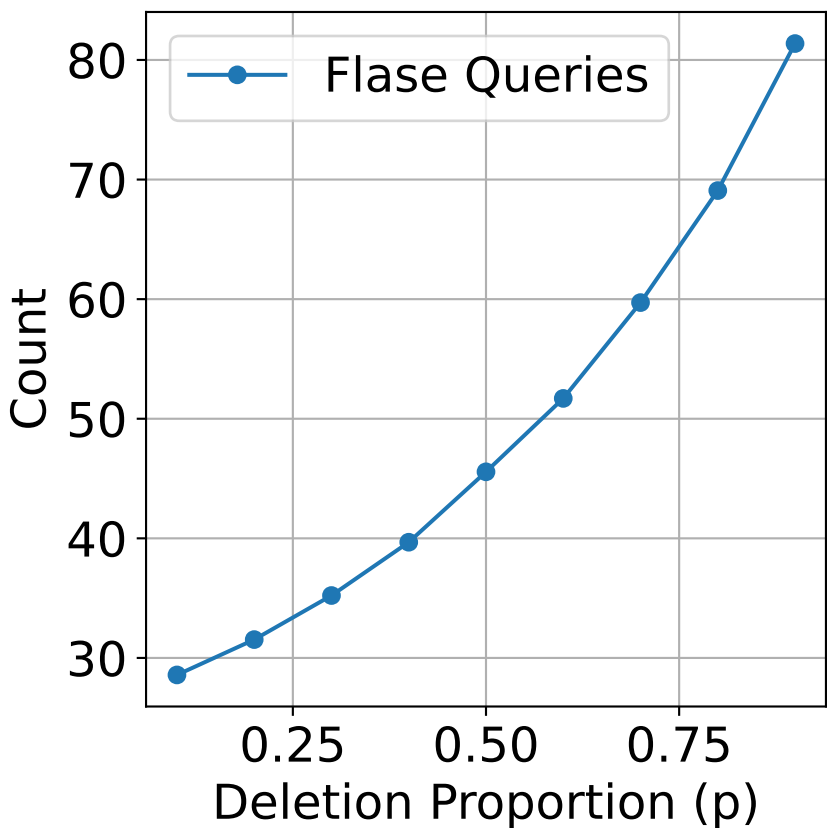

Supplement: supplementary_material [file Deletion.pdf › vector_database_watermarking/roubust/Deletion.pdf]

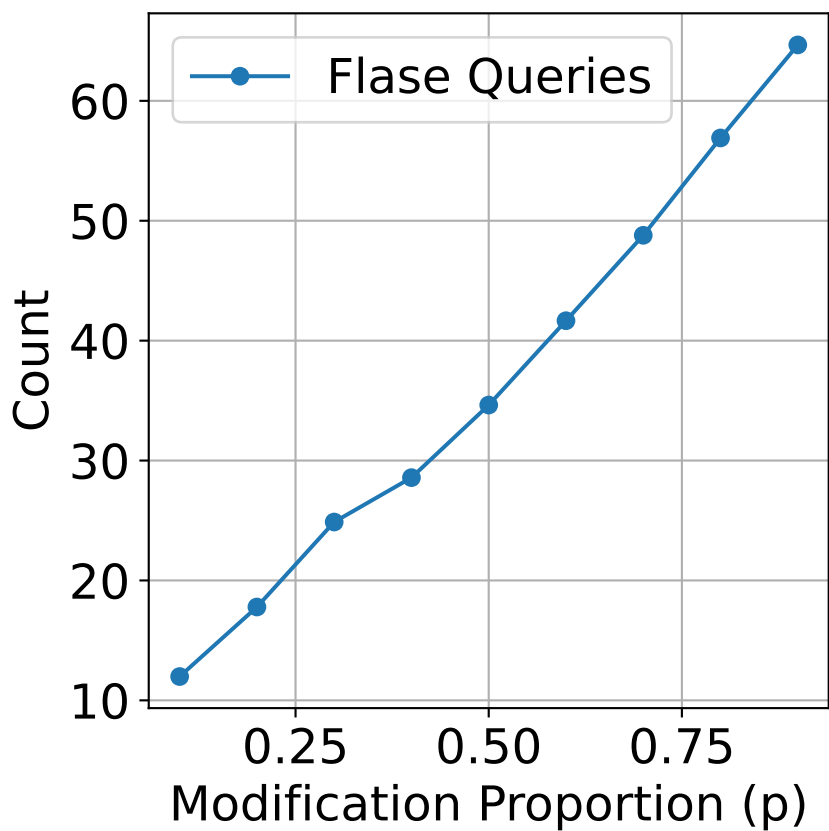

Supplement: supplementary_material [file Modification.pdf › vector_database_watermarking/roubust/Modification.pdf]

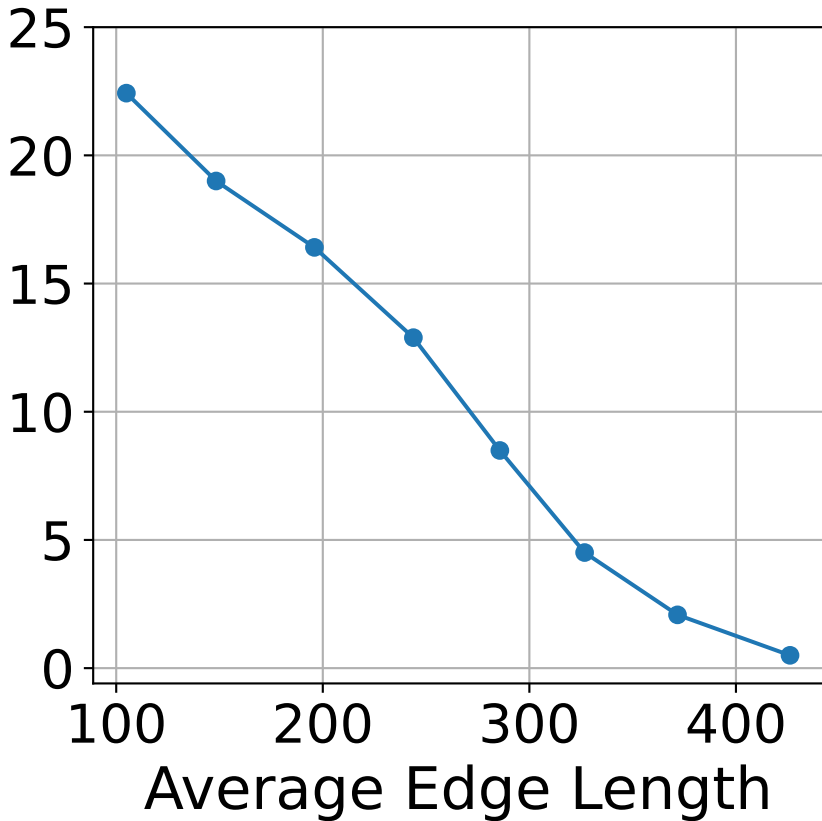

Supplement: supplementary_material [file average_edge_length_query_count.pdf › vector_database_watermarking/t_vector/average_edge_length_query_count.pdf]

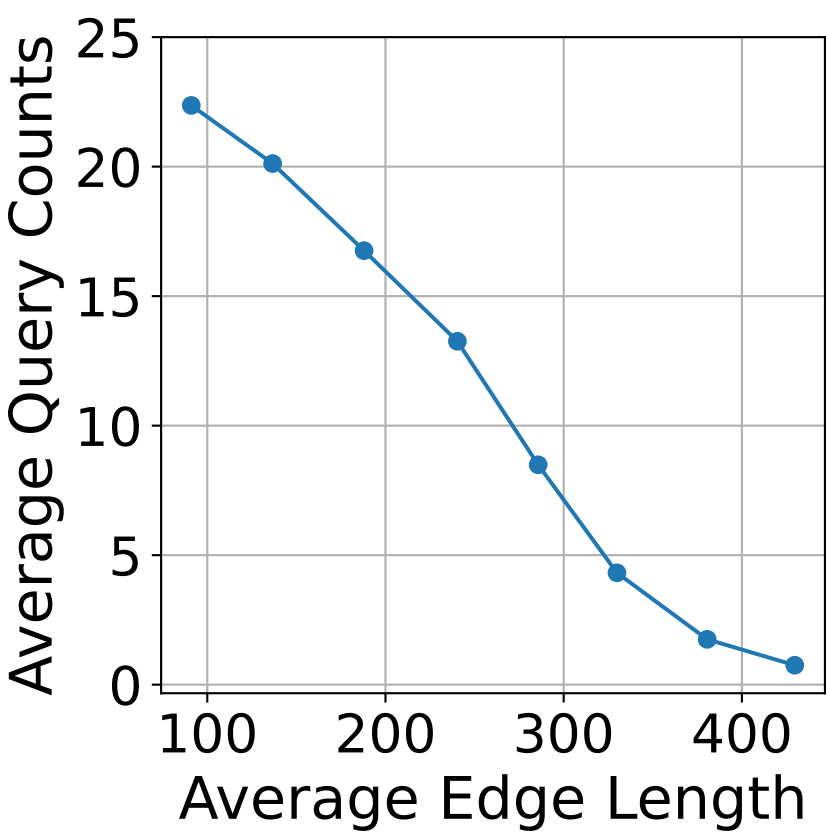

Supplement: supplementary_material [file average_edge_length_query_count1.pdf › vector_database_watermarking/t_vector/average_edge_length_query_count1.pdf]

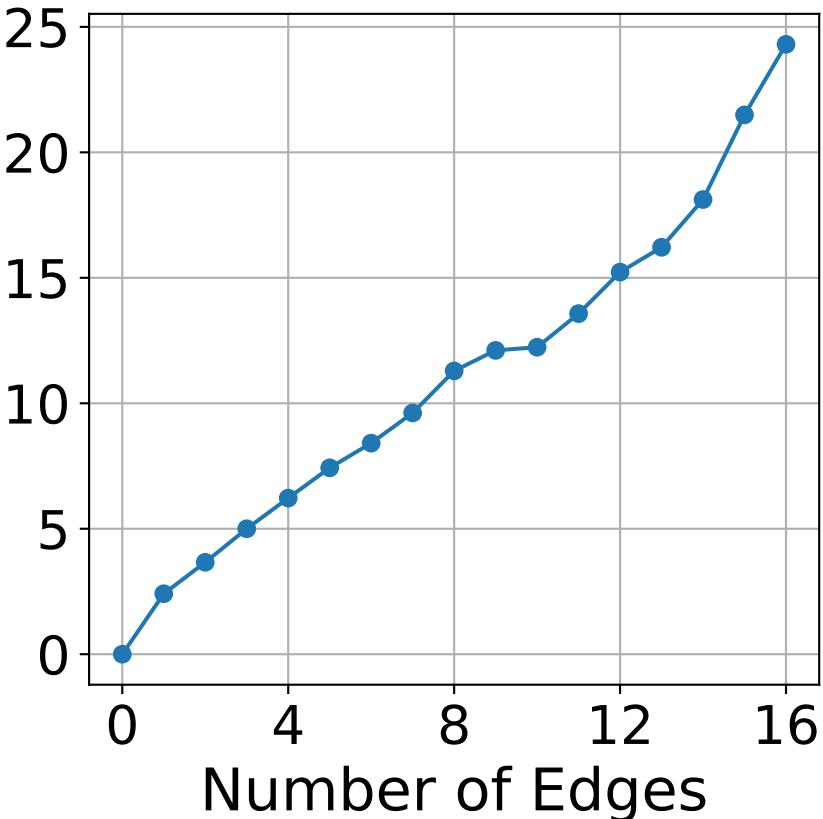

Supplement: supplementary_material [file edge_query_count.pdf › vector_database_watermarking/t_vector/edge_query_count.pdf]

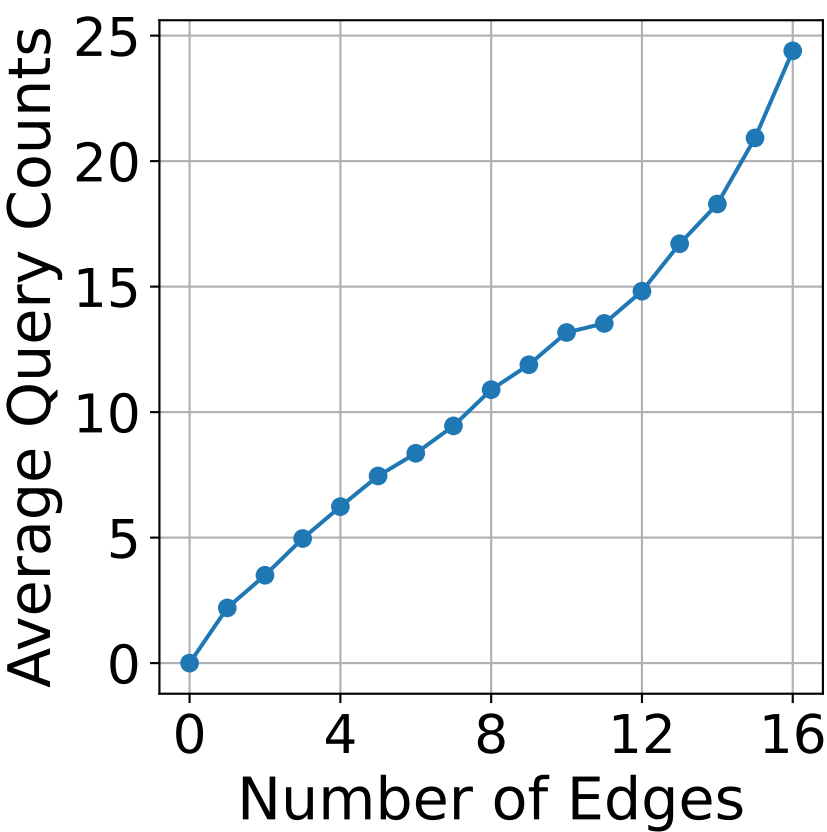

Supplement: supplementary_material [file edge_query_count1.pdf › vector_database_watermarking/t_vector/edge_query_count1.pdf]

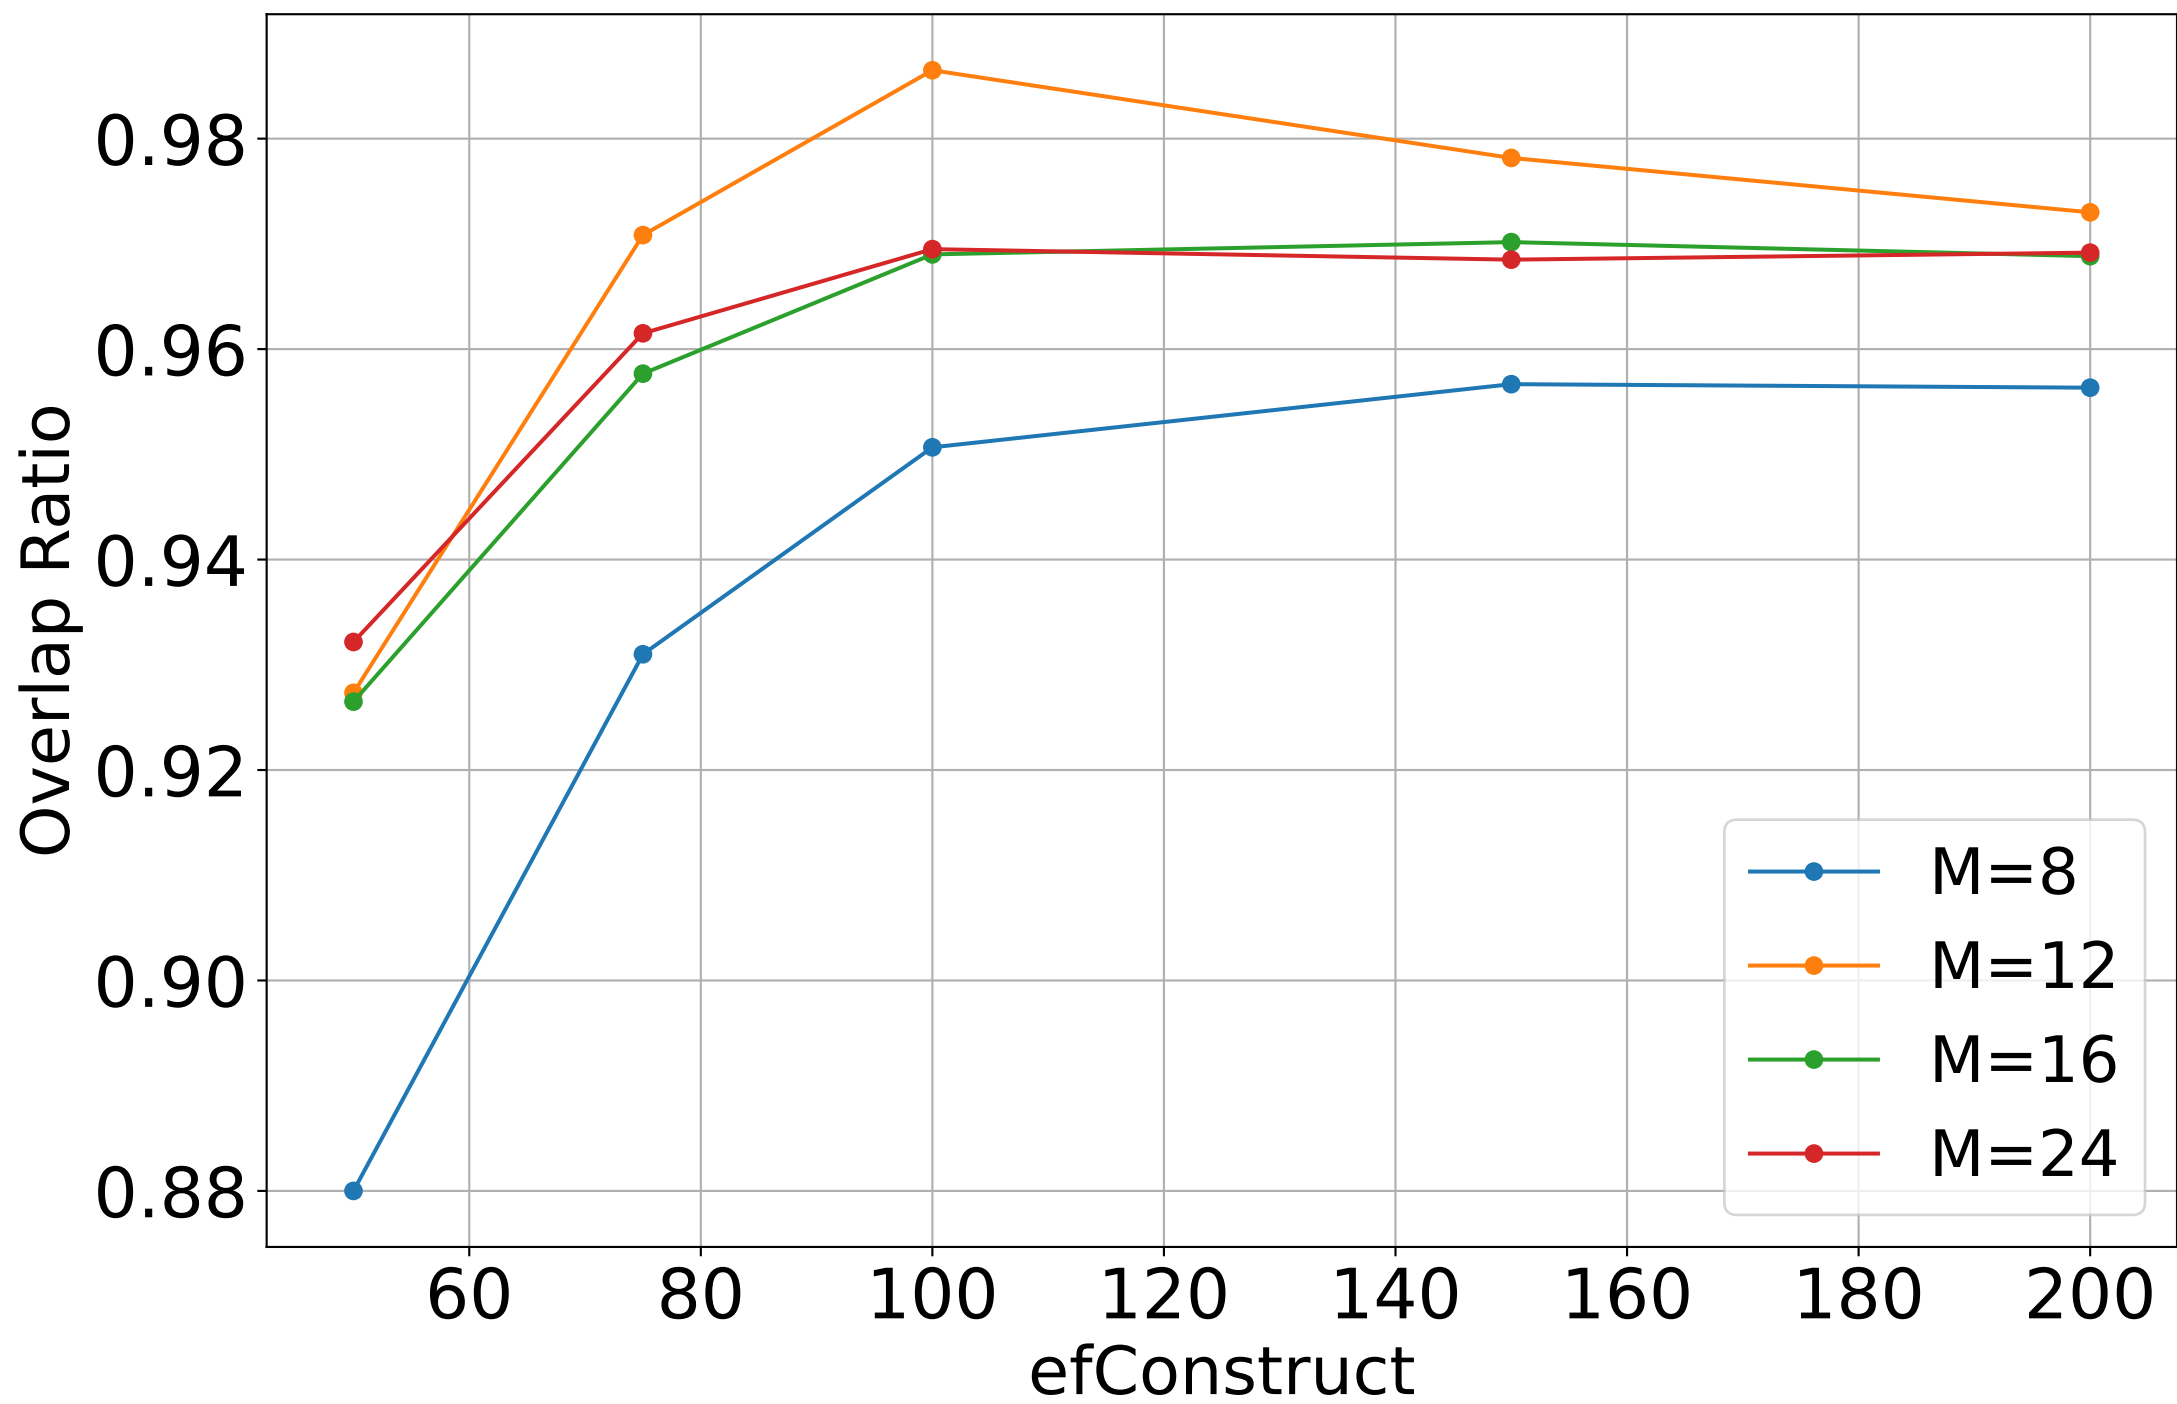

Supplement: supplementary_material [file hidden_nodes_overlap_curves.pdf › vector_database_watermarking/t_vector/hidden_nodes_overlap_curves.pdf]

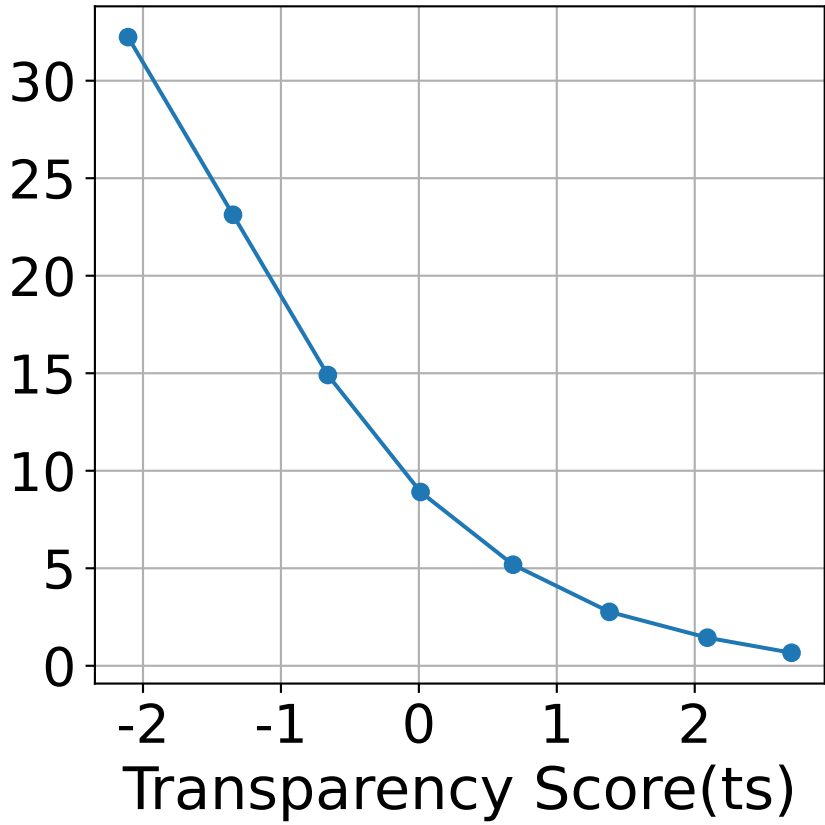

Supplement: supplementary_material [file ts_query_count.pdf › vector_database_watermarking/t_vector/ts_query_count.pdf]

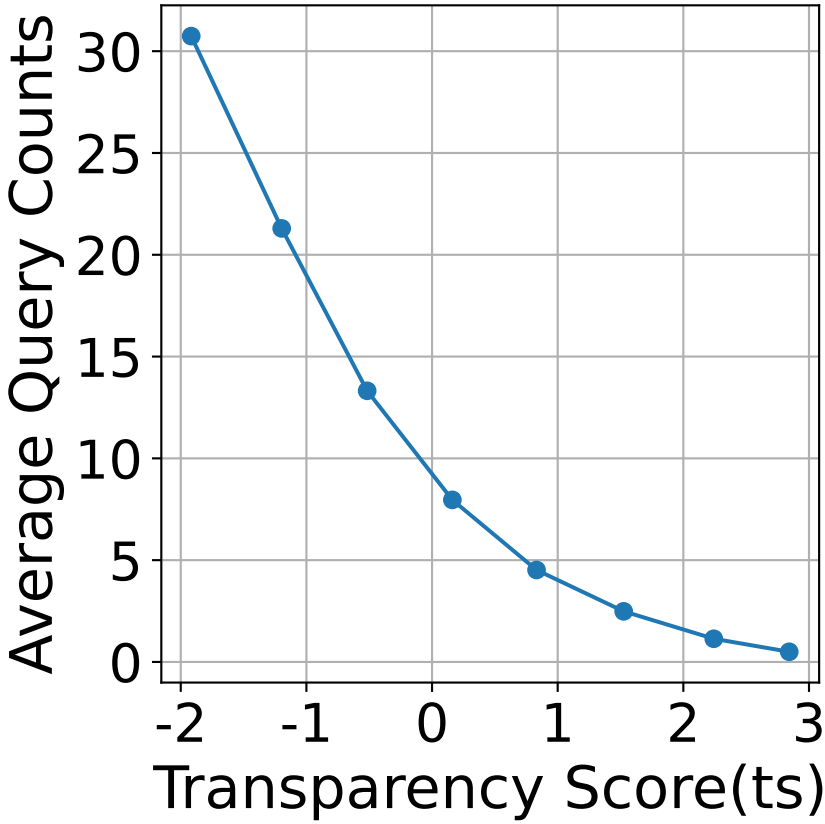

Supplement: supplementary_material [file ts_query_count1.pdf › vector_database_watermarking/t_vector/ts_query_count1.pdf]
